# Supplementary material for: Manipulating the piezoelectric response of BCZT-based ceramics through BMS doping-controlled domain size and phase boundary engineering
Source: Royal Society of Chemistry journal article supplement (doi:10.1039/d5tc03696h), 2025-12-02
Supplement: d5tc03696h1.pdf [file d5tc03696h1.pdf]

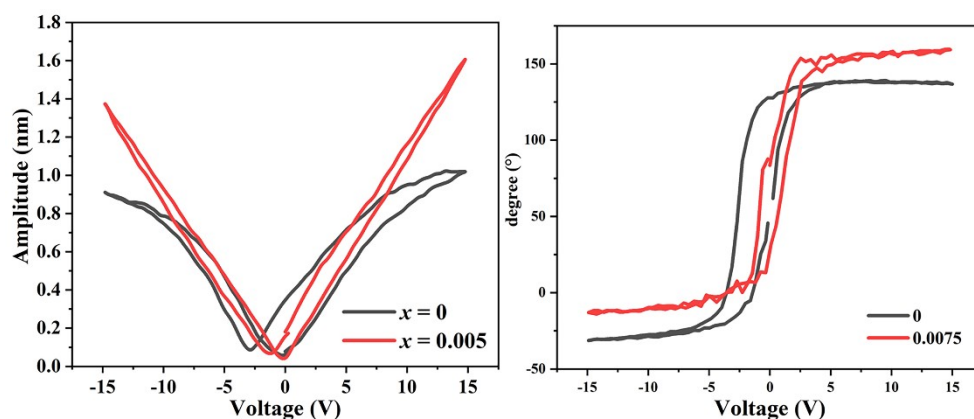

Figure.S1. SS-PFM curves. (a) The butterfly-shaped amplitude loops; (b) the phase loops

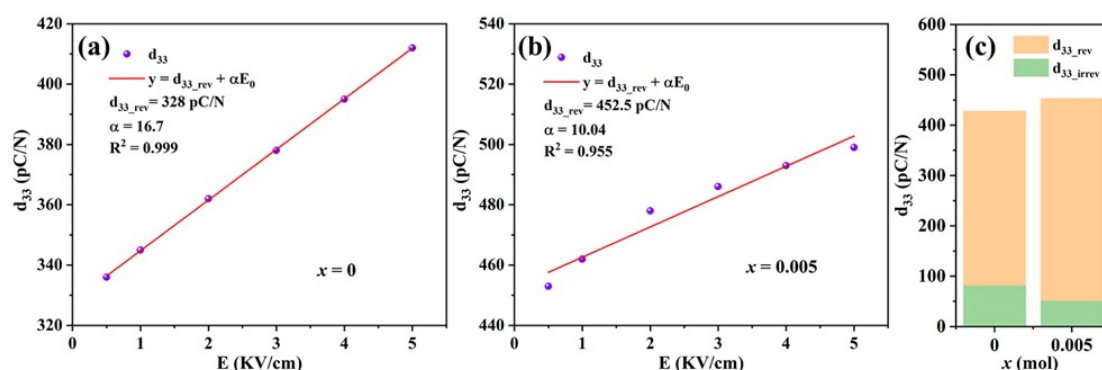

Figure S2. Rayleigh fitting curve of (a)  $x = 0$ ; (b)  $x = 0.0075$ ; (c) Piezoelectric contribution calculation for  $d_{33\_rev}$  and  $d_{33\_irrev}$ .

## Phase field simulation

We employed Phase-field simulations to simulate the microstructure evolution under stress temperature field of samples with compositions  $x = 0$  and  $x = 0.005$ . The size of the simulation model is  $1000 \times 600$  nm<sup>2</sup>, and the total free energy includes the following terms:

$$F = \int_V (f_{bulk} + f_{grad} + f_{elas} + f_{elec}) dV + \int_V f_{localelec} dV \quad (1)$$

$$\begin{aligned} f_{bulk} &= \alpha_1 (p_1^2 + p_2^2 + p_3^2) + \alpha_{11} (p_1^2 + p_2^2 + p_3^2)^2 + \alpha_{111} (p_1^2 + p_2^2 + p_3^2)^3 + (p_1^2 p_2^2 \\ &+ \alpha_{112} (p_1^4 p_2^2 + p_2^4 p_3^2 + p_1^4 p_3^2 + p_1^2 p_2^4 + p_1^2 p_3^4 + p_2^2 p_3^4 + p_1^2 p_3^4) + \alpha_{113} (p_1^2 \\ &p_2^2 p_3^2) \end{aligned} \quad (2)$$

Where the term  $f_{bulk}$  in Eq. (1) describes the bulk free energy density, expressed by Landau's free energy term in Eq. (2).  $\alpha_1$ ,  $\alpha_{11}$ ,  $\alpha_{12}$  are Landau coefficients depending on

defect concentration  $c$  and temperature  $T$ .  $\alpha_{111}$ ,  $\alpha_{112}$ ,  $\alpha_{113}$  are constant coefficients. It should be noticed that the multiple terms in Eq. (2) decide the stability of ferroelectric phases (R, T, O, or C) and barriers between different ferroelectric phases. The global field effect  $f_{\text{grad}}$  can be described by the associated coefficients referred <sup>[1-3]</sup>. The  $f_{\text{elas}}$  reflects the long-range elastic interaction energy. The last term  $f_{\text{localelec}}$  in Eq. (1) represents the local field effect caused by doped defects.

The temporal evolution of the domain structure can be obtained by solving the time-dependent Ginzburg-Landau (TDGL) function as Eq. (3)

$$\frac{dP_i(x,t)}{dt} = -M \frac{\delta F}{\delta P_i(x,t)}, i = 1, 2, 3 \quad (3)$$

where  $M$  is the kinetic coefficient related to the domain mobility and  $t$  is time. Further mathematical transformation was employed to obtain the symmetry contours from the calculated vector maps. The corresponding simulation results are presented in Fig. 5 (h).

- [1] J. Gao, X. Hu, Y. Liu, Y. Wang, X. Ke, D. Wang, L. Zhong and X. Ren, J. Phys. Chem. C, 2017, 121, 2243-2250.
- [2] J. Gao, Y. Dai, X. Hu, X. Ke, L. Zhong, S. Li, L. Zhang, Y. Wang, D. Wang and Y. Wang, EPL, 2016, 115, 37001.
- [3] X. Hu, J. Gao, Y. Wang, Y. Liu, L. Li, D. Wang, F. Li, R. Yao, L. Zhong and X. Ren, J. Phys. Chem. C, 2019, 123, 15434-15440.
